# Supplementary material for: De Novo Design of Antimicrobial Peptides With a Special Charge Pattern and Their Application in Combating Plant Pathogens
Source: PubMed Central journal article supplement (PMC8514817; doi:10.3389/fpls.2021.753217), 2021-09-30
Supplement: Data_Sheet_1.pdf [file Data_Sheet_1.pdf]

## *Supplementary Material*

### 1 Supplementary Tables

**SUPPLEMENTARY TABLE S1** | The pathogens and their growth conditions used in this study.

| Pathogen                                                                      | Rich/minimal medium              | Growth temperature |
|-------------------------------------------------------------------------------|----------------------------------|--------------------|
| <i>Eco</i><br>( <i>Escherichia coli</i> )                                     | LB <sup>3</sup> /M9 <sup>4</sup> | 37°C               |
| <i>Xev</i><br>( <i>Xanthomonas euvesicatoria</i> )                            | 523 <sup>1</sup> /- <sup>1</sup> | 28°C               |
| <i>Xcc</i><br>( <i>Xanthomonas campestris</i> pv. <i>campestris</i> )         | 523/-                            | 28°C               |
| <i>Xoo</i><br>( <i>Xanthomonas oryzae</i> pv. <i>oryzae</i> )                 | 523/-                            | 28°C               |
| <i>Atu</i><br>( <i>Agrobacterium tumefaciens</i> )                            | YEP <sup>2</sup> /-              | 28°C               |
| <i>Pcc</i><br>( <i>Pectobacterium carotovorum</i> subsp. <i>carotovorum</i> ) | LB/M9                            | 28°C               |
| <i>Ech</i><br>( <i>Erwinia chrysanthemi</i> )                                 | LB/M9                            | 28°C               |
| <i>Pst</i><br>( <i>Pseudomonas syringae</i> pv. <i>tomato</i> )               | KB <sup>5</sup> /-               | 28°C               |
| <i>Pss</i><br>( <i>Pseudomonas syringae</i> pv. <i>syringae</i> )             | KB                               | 28°C               |
| <i>Rs</i><br>( <i>Ralstonia solanacearum</i> )                                | 523/M9                           | 28°C               |
| <i>Cgl</i><br>( <i>Colletotrichum gloeosporioides</i> )                       | PD <sup>6</sup> /CD <sup>7</sup> | 25–28°C            |
| <i>Bc</i><br>( <i>Botrytis cinerea</i> )                                      | PD/CD                            | 25~28°C            |

<sup>1</sup>523: Bacterial rich medium 523. “-” indicates no minimal medium was used for the indicated pathogen in this study.

<sup>2</sup>YEP: Yeast extract peptone medium

<sup>3</sup>LB: Luria broth medium

<sup>4</sup>M9: M9 minimum medium

<sup>5</sup>KB: King’s B medium

<sup>6</sup>PD: Potato dextrose medium

<sup>7</sup>CD: Modified Czapek-Dox (CD) minimal medium

**SUPPLEMENTARY TABLE S2** | Effects of selected peptides on the plant disease responses after the infection with *Pectobacterium carotovorum* subsp. *carotovorum* (*Pcc*) and *Botrytis cinerea* (*Bc*).

| Peptide | Plant response to infection with: |                     |                                      |                            |
|---------|-----------------------------------|---------------------|--------------------------------------|----------------------------|
|         | <i>Pcc</i>                        |                     | <i>Bc</i>                            |                            |
|         | Tomato                            | Arabidopsis         | Tomato                               | Arabidopsis                |
| pepD2   | ns(3)                             | T*(1), ns(2), S*(1) | S*(1) S***(1)                        | ns(2)                      |
| pepD3   | ns(5), S*(1)                      | T*(1), ns(4), S*(1) | ns(1), S***(1)                       | T**(1), ns(2)              |
| pepD2M  | T*(3), T**(1),<br>T****(5)        | T*(2), T****(4)     | T*(1), T**(2),<br>T****(1), T****(7) | T*(2), T****(4)            |
| pepD3M  | T**(2), T****(2),<br>T****(2)     | T**(1), T****(4)    | T*(1), T**(1),<br>T****(2), T****(8) | T*(1), T**(1),<br>T****(4) |

The *Pcc* cell suspension ( $10^6$  CFU/mL in 10mM MgSO<sub>4</sub>, 0.01% Silwet L-77) was mixed with the indicated peptide (64 µg/mL) at a 3:1 ratio to produce a final peptide concentration of 16 µg/mL. The *Bc* spore suspension ( $10^4$  spores/mL for the tomato inoculation and  $10^5$  spores/mL for the Arabidopsis inoculation) was mixed with the indicated peptide (64 µg/mL) at a 3:1 ratio to produce a final peptide concentration of 16 µg/mL. Crude peptides that were not purified via high-performance liquid chromatography (HPLC) were used. Detached leaves of 4-week-old tomato L390 plants and leaves of the intact Arabidopsis Col0 plants were wounded with a 10µL micropipette tip and then droplet-inoculated with 10 µL of a pathogen-peptide mixture on the wounding sites. The diameters of the lesions were measured 16–28 h post-inoculation for *Pcc* and 47–70 h post-inoculation for *Bc*. Pair-wise comparisons of the water- and the peptide-treated samples were made using the Student's *t*-test (“ns”, no significant difference; \**P* < 0.05, \*\**P* < 0.01, \*\*\**P* < 0.001, \*\*\*\**P* < 0.0001). “T” indicates that the peptide-treated plants were more tolerant to the pathogens than were the water-treated plants. “S” indicates that the peptide-treated plants were more susceptible to the pathogens than were the water-treated plants. The numbers in parentheses are the numbers of batches that showed the indicated result.

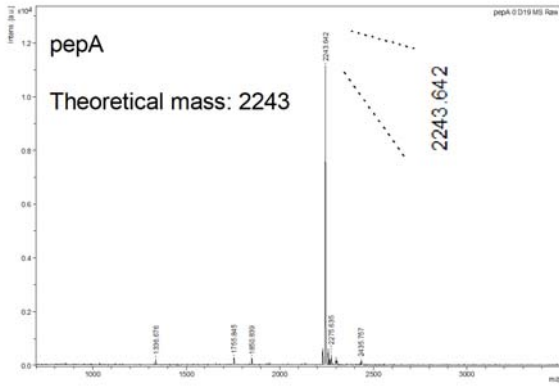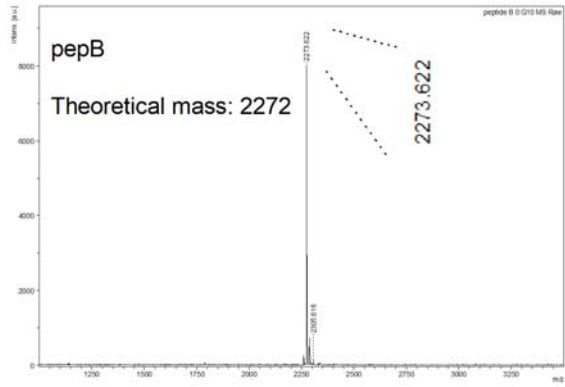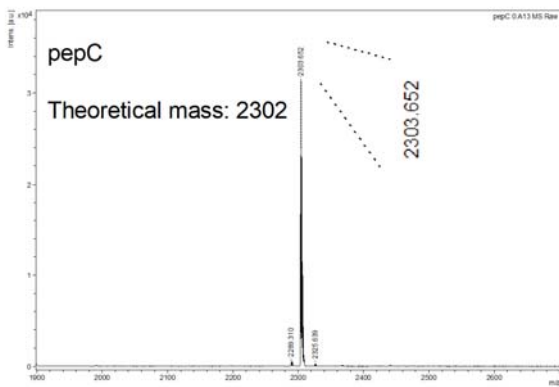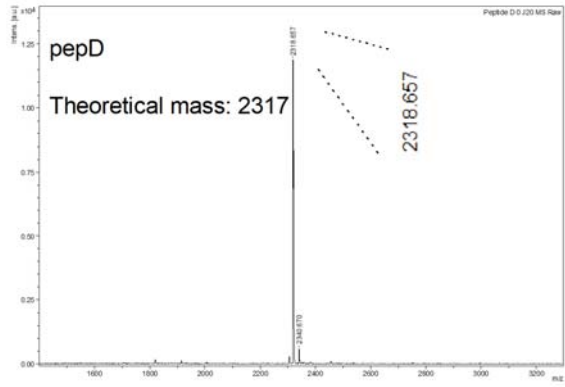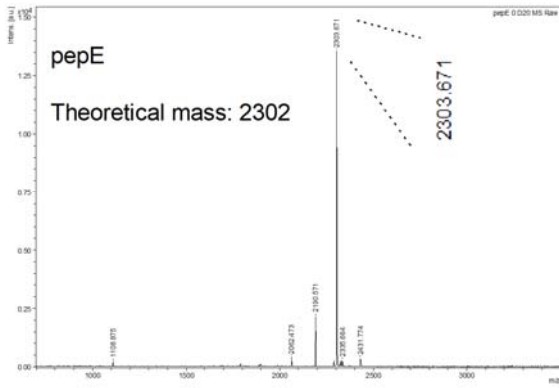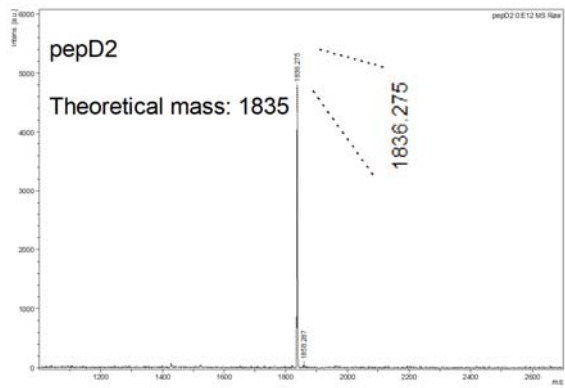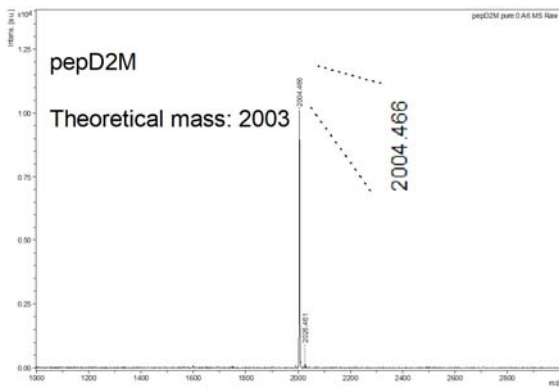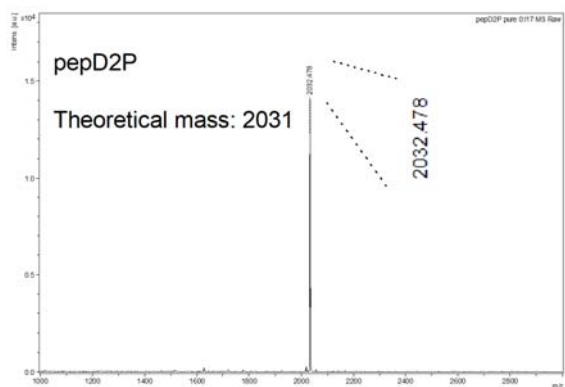

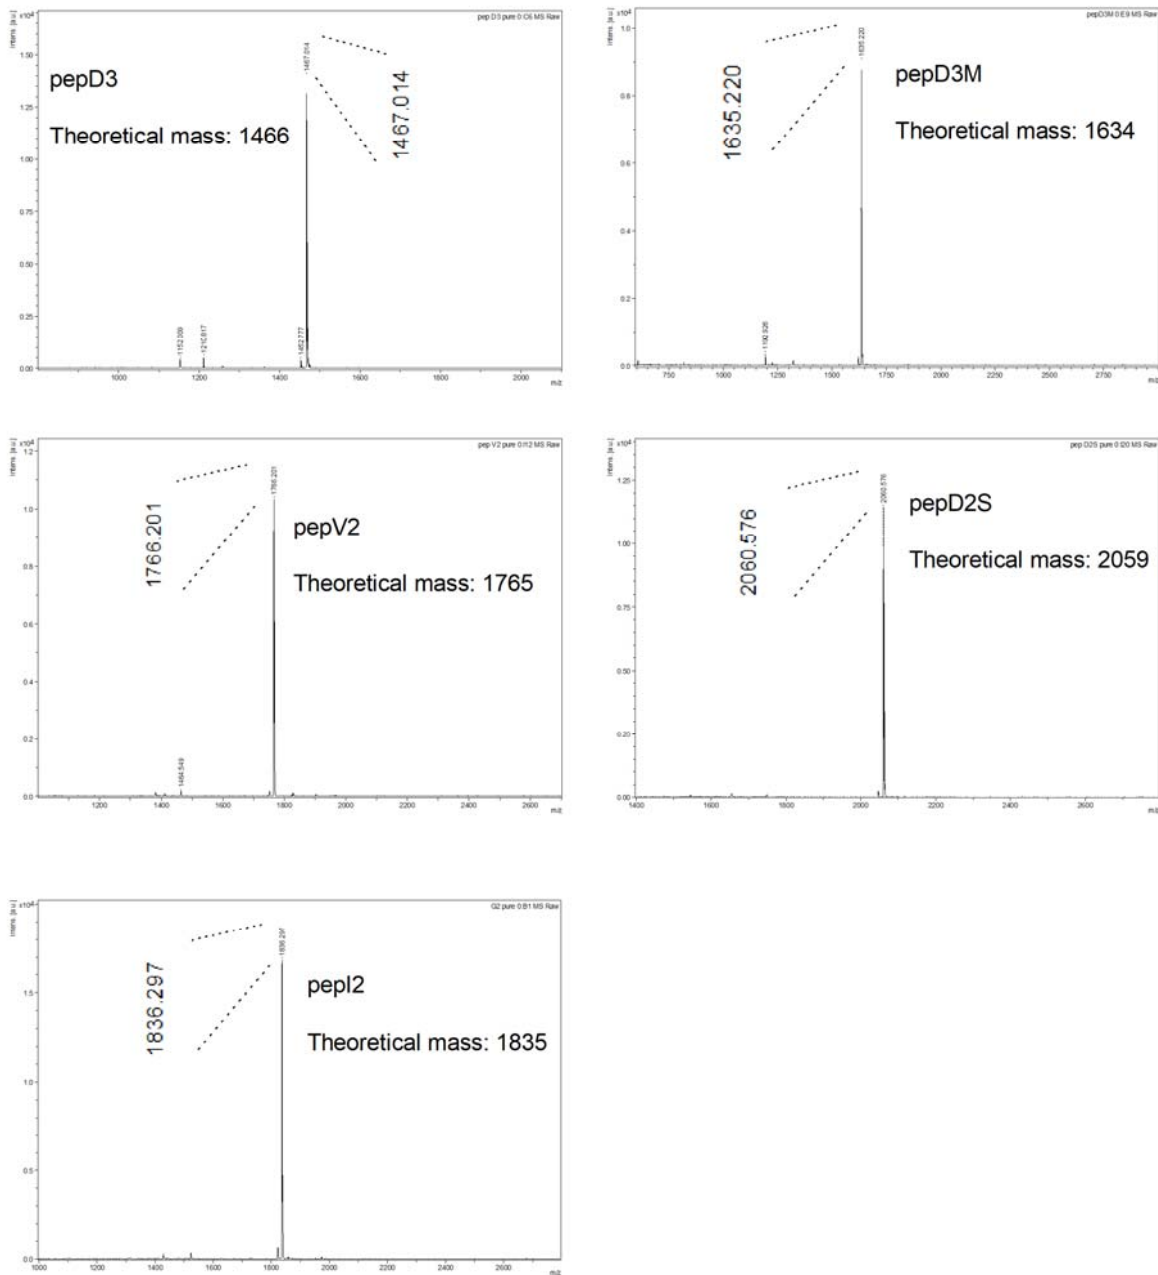

**SUPPLEMENTARY FIGURE S1.** Mass spectra of the peptides used in this study.
